# Supplementary material for: Antimicrobial Consumption among 66 Acute Care Hospitals in Catalonia: Impact of the COVID-19 Pandemic
Source: MDPI journal article supplement (doi:10.3390/antibiotics10080943), 2021-08-04
Supplement: s1 [file s1]

## File S1. Contribution log

### Collaborators list:

Ana **Ayestarán**: Department of Pharmacy, Hospital de Barcelona, 08034 Barcelona, Spain; aayestarana@gmail.com  
Ana **Montero**: Department of Pharmacy, Hospital Universitario Quirón Dexeus, 08028 Barcelona, Spain; ana.montero@quironsalud.es  
Anisi **Moron**: Department of Pharmacy, Hospital de Sabadell, 08208 Sabadell, Spain; Amoron@tauli.cat  
Anna **Capellà**: Department of Pharmacy, Parc Sanitari S. Joan Déu - HG, 08830 Sant Boi de Llobregat, Spain; anna.capella@pssjd.org  
Anna **Clopes**: Department of Pharmacy, Institut Català d'Oncologia, 08908 L'Hospitalet de Llobregat, Spain; aclopes@iconcologia.net  
Antònia **Balet**: Department of Pharmacy, Althaia, Hospital de Sant Joan de Déu, 08243 Manresa, Spain; abalet@althaia.cat  
Ariadna **Padulles**: Department of Pharmacy, Hospital Universitari de Bellvitge, 08907 L'Hospitalet de Llobregat, Spain; apadulles@bellvitgehospital.cat  
Begoña **Pascual**: Department of Pharmacy, Hospital Municipal de Badalona, 08911 Badalona, Spain; bpascual@bsa.cat  
Camil la **Valls**: Department of Pharmacy, Hospital Universitari de Vic, 08500 Vic, Spain; cvalls@chv.cat  
Carme **Ortiz**: Department of Pharmacy, Centre MQ Reus, 43201 Reus, Spain; carme.ortiz@centremq.cat  
Carmen **Muñoz**: Department of Pharmacy, ICO L'Hospitalet, 08908 L'Hospitalet de Llobregat, Spain; cms@iconcologia.net  
Cristina **Toro**: Department of Pharmacy, Hospital Santa Caterina, 17190 Salt, Spain; cristina.toro@ias.cat  
Daniel **Serrano**: Department of Pharmacy, Hospital El Pilar, 08006 Barcelona, Spain; daniel.serrano@quironsalud.es  
Daria **Ayago**: Department of Pharmacy, Hospital Comarcal d'Amposta, 43870 Amposta, Spain; daria.ayago@grupsagessa.com  
David **Brandariz**: Department of Pharmacy, Hospital QuirónSalud Barcelona, 08023 Barcelona, Spain; vrandariz@gmail.com  
David **Campany**: Department of Pharmacy, Hospital Universitari Vall d'Hebron, 08035 Barcelona, Spain; dcampany@vhebron.net  
Eduard **Hidalgo**: Department of Pharmacy, H. de l'Hospitalet-H. Moisès Broggi, 08970 Sant Joan Despí, Spain; eduard.hidalgo@sanitatintegral.org  
Eduarne **Fernandez**: Department of Pharmacy, Hospital de la Santa Creu i Sant Pau, 08041 Barcelona, Spain; eFernandezG@santpau.cat  
Elisenda **Flotats**: Department of Pharmacy, Hospital de la Cerdanya, 17520 Puigcerdà, Spain; eflotats@hcerdanya.eu  
Esperanza **Gil**: Department of Pharmacy, Hospital Comarcal Móra d'Ebre, 43770 Móra d'Ebre, Spain; esperanza.gil@grupsagessa.cat  
Esther **Julián**: Department of Pharmacy, Hospital de Tortosa Verge de la Cinta, 43500 Tortosa, Spain; ejulian.ebre.ics@gencat.cat  
Esther **López**: Department of Pharmacy, Hospital Clínic de Barcelona, 08036 Barcelona, Spain; eslopez@clinic.cat  
Eugènia **Òdena**: Department of Pharmacy, Hospital Comarcal de Sant Bernabé, 08600 Berga, Spain; eodena@hsb.cat  
Gemma **Enrique-Tarancon**: Department of Pharmacy, Clínica Nova Aliança, 25006 Lleida, Spain; genriquetarancon@minovalianca.com  
Glòria **Gayola**: Department of Pharmacy, Clínica Girona, 17002 Girona, Spain; farmaceutics@clinicagirona.cat  
Isabel **Frigola**: Department of Pharmacy, Clínica Salus Infirmorum, 17820 Banyoles, Spain; ifrigola@clnicasalus.org  
Isabel **Martínez**: Department of Pharmacy, Hospital Sant Pau i Santa Tecla and Hospital del Vendrell, 43003 Tarragona, Spain; imartinez@xarxatecla.cat  
Jordi **Fernández**: Department of Pharmacy, Centre Mèdic Teknon, 08022 Barcelona, Spain; jfernandez@cmteknon.com

**Josep Torrent:** Department of Pharmacy, Pius Hospital de Valls, 43800 Valls, Spain;  
jtorrent@piushospital.cat

**Juan Serrais:** Department of Pharmacy, Hospital d'Igualada, 08700 Igualada, Spain; jserrais@csa.cat

**Laura Canadell:** Department of Pharmacy, H Univ. Joan XXIII de Tarragona, 43005 Tarragona, Spain;  
lcanadell.hj23.ics@gencat.cat

**Laura Gratacos:** Department of Pharmacy, Hospital U Dr Josep Trueta de Girona, 17007 Girona, Spain;  
lgratacos.girona.ics@gencat.cat

**Leonor Munell:** Department of Pharmacy, Hospital de Campdevàdol, 17530 Campdevàdol, Spain;  
lmunell@hoscamp.com

**Lidia Salse:** Department of Pharmacy, Fundació Puigvert - IUNA, 08025 Barcelona, Spain;  
lsalse@fundacio-puigvert.es

**Ludivina Ibañez:** Department of Pharmacy, Espitau Val d'Aran, 25530 Vielha, Spain;  
libanez@aransalut.com

**M<sup>a</sup> José Fraile:** Department of Pharmacy, Hospital Sant Rafael, 08035 Barcelona, Spain;  
mjfraile.hsrafael@hospitalarias.es

**M<sup>a</sup> Rosa Garriga:** Department of Pharmacy, Hospital U. Mútua de Terrassa, 08221 Terrassa, Spain;  
rgarriga@mutuaterrassa.es

**Maite Barrera:** Department of Pharmacy, Hospital Dos de Maig, 08025 Barcelona, Spain;  
mariateresa.barrerapuigdollers@sanitatintegral.org

**Manuel Cano:** Department of Pharmacy, Hospital U. Arnau de Vilanova de Lleida, 25198 Lleida, Spain;  
smcano.lleida.ics@gencat.cat

**Maria Alcaide:** Department of Pharmacy, ICO Badalona, 08916 Badalona, Spain; malcalder@iconcologia

**Maria José Berges:** Department of Pharmacy, Centre Prevenció i Rehabilitació Asepeyo, 08010 Barcelona, Spain; mbergesfraile@asepeyo.es

**Maria Sagales:** Department of Pharmacy, Hospital General de Granollers, 08402 Granollers, Spain;  
msagales@fhag.es

**Marina De Temple:** Department of Pharmacy, Hospital Universitari Sagrat Cor, 08029 Barcelona, Spain;  
mdetemple@quironsalud.es

**Marisa Graño:** Department of Pharmacy, Hospital Comarcal del Pallars, 25620 Tremp, Spain;  
mgranyo@hospitalpallars.com

**Marlene Alvarez:** Department of Pharmacy, H. U. Germans Trias i Pujol de Badalona, 08916 Badalona, Spain; malvarezm.germanstrias@gencat.cat

**Marta Martí:** Department of Pharmacy, Hospital Sant Joan de Déu (Martorell), 08760 Martorell, Spain;  
mmarti@hmartorell.es

**Melisa Barrantes:** Department of Pharmacy, Hospital Plató, 08006 Barcelona, Spain; mebarrantes@clinic.cat

**Mireia Fuster:** Department of Pharmacy, Hospital de Terrassa, 08227 Terrassa, Spain; mfuster@cst.cat

**Montse Lladó:** Department of Pharmacy, Centre Mèdic Delfos, 08023 Barcelona, Spain;  
llado.far@centromedicodelfos.es; llado.far@delfos.cat

**Montserrat Carrascosa:** Department of Pharmacy, Clínica Terres de l'Ebre, 43500 Tortosa, Spain;  
montserrat.carrascosa@saluttortosa.cat

**Montserrat Navarro:** Department of Pharmacy, Hospital Santa Maria, 25198 Lleida, Spain;  
mnavarro@gss.cat

**Nàtalia Carrasco:** Department of Pharmacy, Hospital de Viladecans, 08840 Viladecans, Spain;  
ncarrasco.hv@gencat.cat

**Nuri Quer:** Department of Pharmacy, ICO Girona, 17007 Girona, Spain; nquer@iconcologia.net

**Núria Bosacoma:** Department of Pharmacy, Hospital de Palamós, 17230 Palamós, Spain;  
nbosacoma@ssibe.cat

**Núria Miserachs:** Department of Pharmacy, Fundació Hospital de l'Esperit Sant, 08923 Santa Coloma de Gramenet, Spain; nmiserac@fhes.cat

**Olga Curiel:** Department of Pharmacy, Hospital de Sant Celoni, 08470 Sant Celoni, Spain;  
ocuriel@hsceloni.cat

**Patricia Domínguez:** Department of Pharmacy, Hospital de Mollet, 08100 Mollet del Vallès, Spain;  
p.dominguez@fsm.cat

**Pilar Alemany:** Department of Pharmacy, Hosp. d'Olot i Comarcal de la Garrotxa, 17800 Olot, Spain;  
palemany@hospiolot.com

**Pilar Salvador:** Department of Pharmacy, Hospital Universitari Sant Joan de Reus, 43204 Reus, Spain;  
psalvador@grupsagessa.com

Rafael **Alberti**: Department of Pharmacy, Hospital Comarcal de Blanes, 17300 Blanes, Spain;  
ralberti@salutms.cat  
Sandra **Barbadillo**: Department of Pharmacy, Hospital General de Catalunya, 08195 Barcelona, Spain;  
sbarbadillo@quironsalud.es  
Silvia **Serdà**: Department of Pharmacy, Hospital Residència Sant Camil, 08810 Sant Pere de Ribes, Spain;  
sserda@csg.cat  
Susana **Terré**: Department of Pharmacy, HC Sant Jaume Calella i HC de Blanes, 08370 Calella, Spain;  
sterre@salutms.cat  
Teresa **Arranz**: Department of Pharmacy, Hospital Comarcal de l'Alt Penedès, 08720 Vilafranca del  
Penedès, Spain; tarranz@csap.cat  
Teresa **Gurrera**: Department of Pharmacy, Hospital de Mataró, 08304 Mataró, Spain; tgurrera@csdm.cat  
Usúe **Manso**: Department of Pharmacy, Fundació Sant Hospital, 25700 La Seu d'Urgell, Spain;  
farmacia@fsh.cat  
Virginia **Gol**: Department of Pharmacy, Hospital de Figueres, 17600 Figueres, Spain;  
vgol@salutemporda.cat  
Virginia Maria **Martínez**: Department of Pharmacy, Institut Guttmann, 08916 Badalona, Spain;  
vmmartinez@guttmann.com

**Collaborators Contributions:** Data curation, A.A., A.M. (Ana Montero), A.M. (Anisi Moron), A.C. (Anna Capellà), A.C. (Anna Clopes), A.B., A.P., B.P., C.V., C.O., C.M., C.T., D.S., D.A., D.B., D.C., E.H., E.F. (Eduarne Fernandez), E.F. (Elisenda Flotats), E.G., E.J., E.L., E.Ò., G.E.-T., G.G., I.F., I.M., J.F., J.T., J.S., L.C., L.G., L.M., L.S., L.I., M.J.F., M.R.G., M.B. (Maite Barrera), M.C. (Manuel Cano), M.A. (Maria Alcaide), M.J.B., M.S., M.D.T., M.G., M.A. (Marlene Alvarez), M.M., M.B. (Melisa Barrantes), M.F., M.L., M.C. (Montserrat Carrascosa), M.N., N.C., N.Q., N.B., N.M., O.C., P.D., P.A., P.S., R.A., S.B., S.S., S.T., T.A., T.G., U.M., V.G. and V.M.M.

**Conflicts of interest:** all the authors declare no conflicts of interest.
