# Supplementary material for: Antimicrobial Consumption among 66 Acute Care Hospitals in Catalonia: Impact of the COVID-19 Pandemic
Source: MDPI journal article supplement (doi:10.3390/antibiotics10080943), 2021-08-04
Supplement: s1 [file s1]

## Supplementary Materials

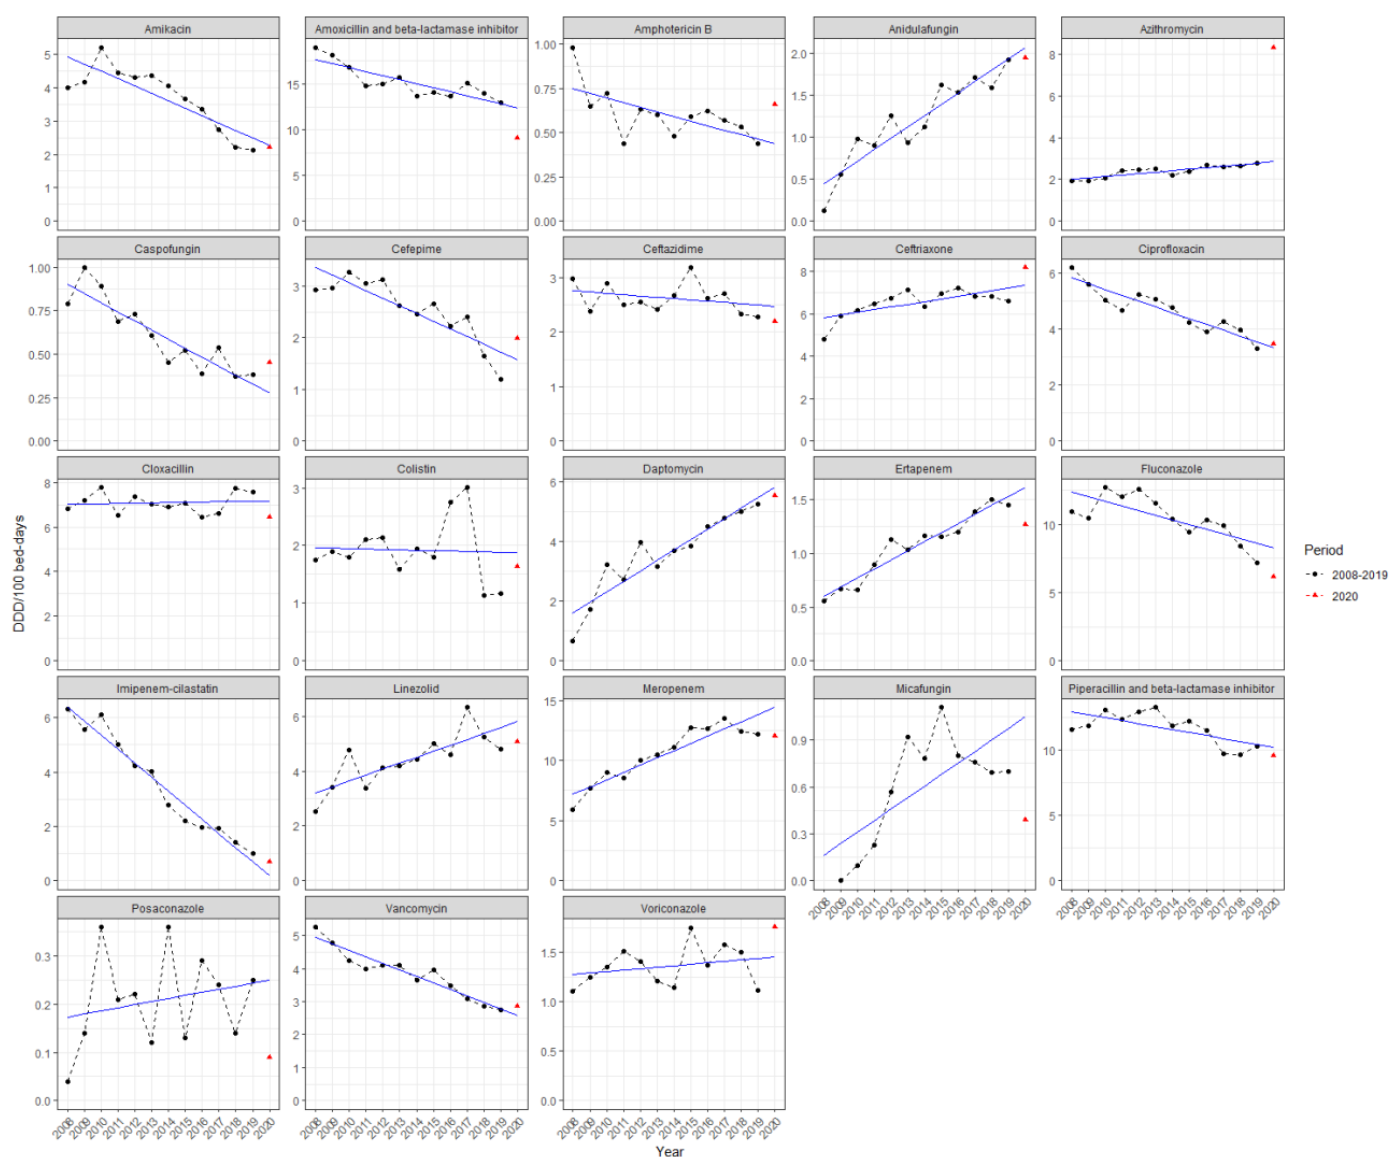

**Figure S1.** Evolution of antibiotics and antimycotics consumption in ICU services between 2008 and 2020 expressed in DDD/100 bed-days. Non COVID-19 period was considered from 2008 to 2019. *Black circles:* Antimicrobial consumption data for every year. *Blue line:* Antimicrobial consumption trend based on data from 2008 to 2019 and projected until 2020. *Red triangle:* Observed 2020 consumption.

**Table S1.** Comparison between expected and observed intensive care unit (ICU) consumption expressed in DDD/100 bed-days. Estimated 2020 consumption was based on the trend from the non-COVID-19 period (2008–2019).

|                                                   | ICU DDD/100 bed-days               |                                   |                  |                         |
|---------------------------------------------------|------------------------------------|-----------------------------------|------------------|-------------------------|
|                                                   | Estimated<br>2020 Con-<br>sumption | Observed<br>2020 Con-<br>sumption | Variation<br>(%) | Prediction<br>intervals |
| J02AA01 Amphotericin B                            | 2.28                               | 2.22                              | −2.63%           | [0.89,3.67]             |
| J01GB06 Amikacin                                  | 12.37                              | 9.13                              | −26.19%          | [9.65,15.09]            |
| J01CR02 Amoxicillin and beta-lactamase inhibitor  | 0.44                               | 0.66                              | 50.00%           | [0.13,0.74]             |
| J02AX06 Anidulafungin                             | 2.07                               | 1.95                              | −5.80%           | [1.55,2.6]              |
| <b>J01FA10 Azithromycin</b>                       | <b>2.85</b>                        | <b>8.32</b>                       | <b>191.93%</b>   | <b>[2.48,3.21]</b>      |
| J02AX04 Caspofungin                               | 0.27                               | 0.45                              | 66.67%           | [0.02,0.53]             |
| J01DE01 Cefepime                                  | 1.58                               | 1.98                              | 25.32%           | [0.74,2.42]             |
| J01DD02 Ceftazidime                               | 2.48                               | 2.2                               | −11.29%          | [1.75,3.2]              |
| J01DD04 Ceftriaxone                               | 7.33                               | 8.19                              | 11.73%           | [6.04,8.61]             |
| J01MA02 Ciprofloxacin                             | 3.34                               | 3.47                              | 3.89%            | [2.51,4.18]             |
| J01CF02 Cloxacillin                               | 7.17                               | 6.45                              | −10.04%          | [5.92,8.41]             |
| J01XB01 Colistin                                  | 1.87                               | 1.64                              | −12.30%          | [0.37,3.38]             |
| J01XX09 Daptomycin                                | 5.82                               | 5.53                              | −4.98%           | [4.41,7.22]             |
| J01DH03 Ertapenem                                 | 1.61                               | 1.27                              | −21.12%          | [1.39,1.84]             |
| J02AC01 Fluconazole                               | 8.25                               | 6.17                              | −25.21%          | [5.32,11.17]            |
| J01DH51 Imipenem-cilastatin                       | 0.19                               | 0.7                               | 268.42%          | [−0.85,1.23]            |
| J01XX08 Linezolid                                 | 5.8                                | 5.06                              | −12.76%          | [4.1,7.5]               |
| J01DH02 Meropenem                                 | 14.43                              | 12.06                             | −16.42%          | [11.95,16.92]           |
| J02AX05 Micafungin                                | 1.05                               | 0.39                              | −62.86%          | [0.33,1.76]             |
| J01CR05 Piperacillin and beta-lactamase inhibitor | 10.21                              | 9.61                              | −5.88%           | [7.7,12.73]             |
| J02AC04 Posaconazole                              | 0.25                               | 0.09                              | −64.00%          | [−0.01,0.51]            |
| J01XA01 Vancomycin                                | 2.57                               | 2.87                              | 11.67%           | [1.96,3.18]             |
| J02AC03 Voriconazole                              | 1.46                               | 1.76                              | 20.55%           | [0.92,1.99]             |

ICU: Intensive Care Unit; DDD: Defined daily doses.
